# Supplementary material for: Grape seed proanthocyanidins suppressed macrophage foam cell formation by miRNA-9 via targeting ACAT1 in THP-1 cells
Source: Royal Society of Chemistry journal article supplement (doi:10.1039/c9fo02352f), 2020-01-01
Supplement: c9fo02352f1.pdf [file c9fo02352f1.pdf]

### Supporting Information

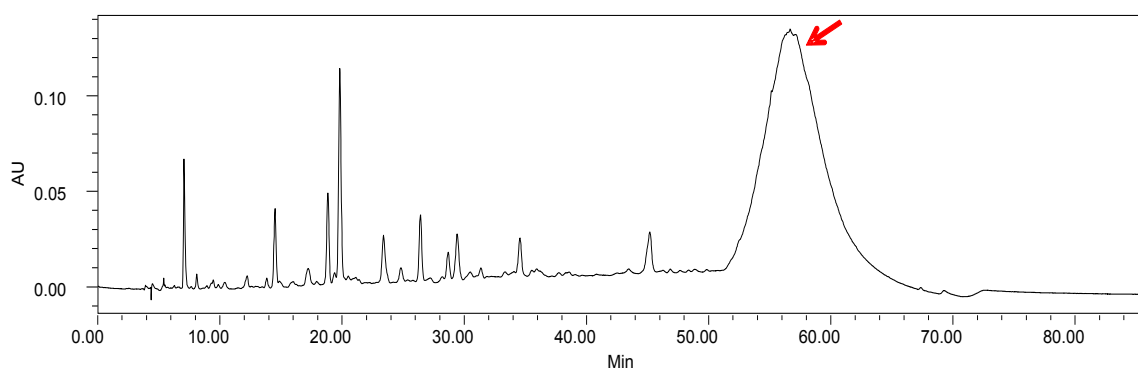

**Figure S1.** Chromatogram of HPLC for proanthocyanidins.

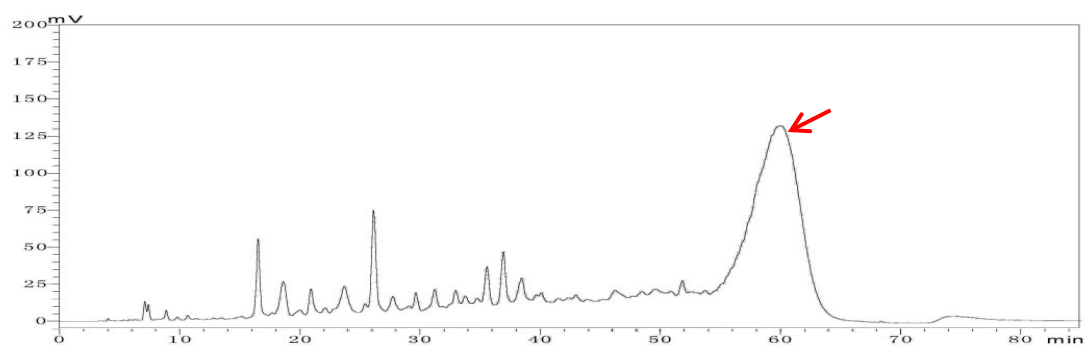

**Figure S2.** Chromatogram of HPLC for standard sample of grape seed oligomeric proanthocyanidins provided by the CCCMHPIE (SW/T 1-2015).
